# Supplementary material for: In Vitro and Pre-Clinical Evaluation of Locally Isolated Phages, vB_Pae_SMP1 and vB_Pae_SMP5, Formulated as Hydrogels against Carbapenem-Resistant Pseudomonas aeruginosa
Source: MDPI journal article supplement (doi:10.3390/v14122760), 2022-12-11
Supplement: s1 [file s1]

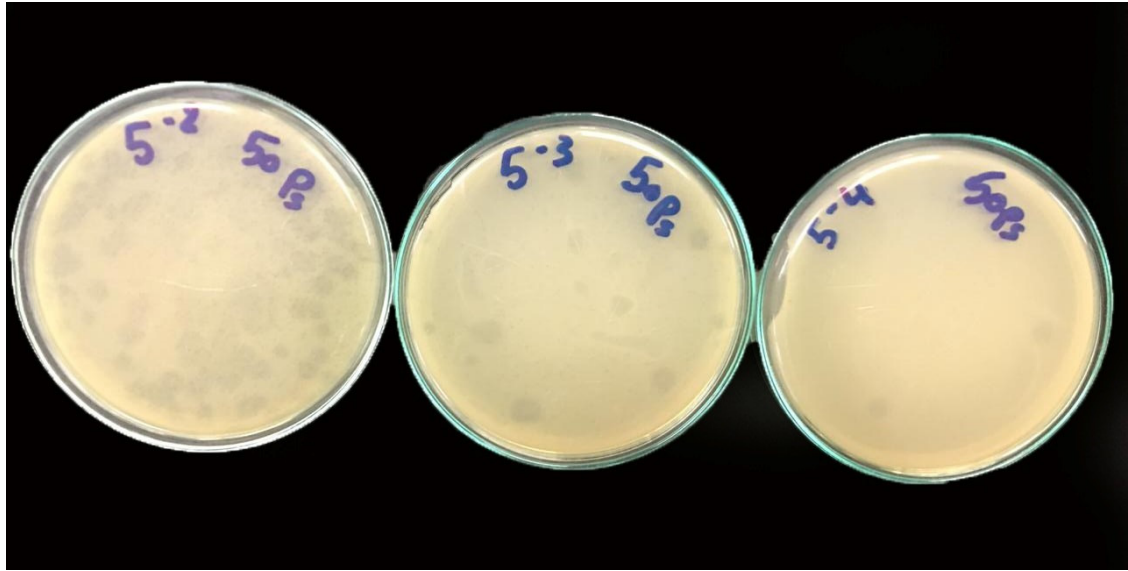

**Figure S1.** Plaque assay results of VB\_PAE\_SMP5 at different dilutions.

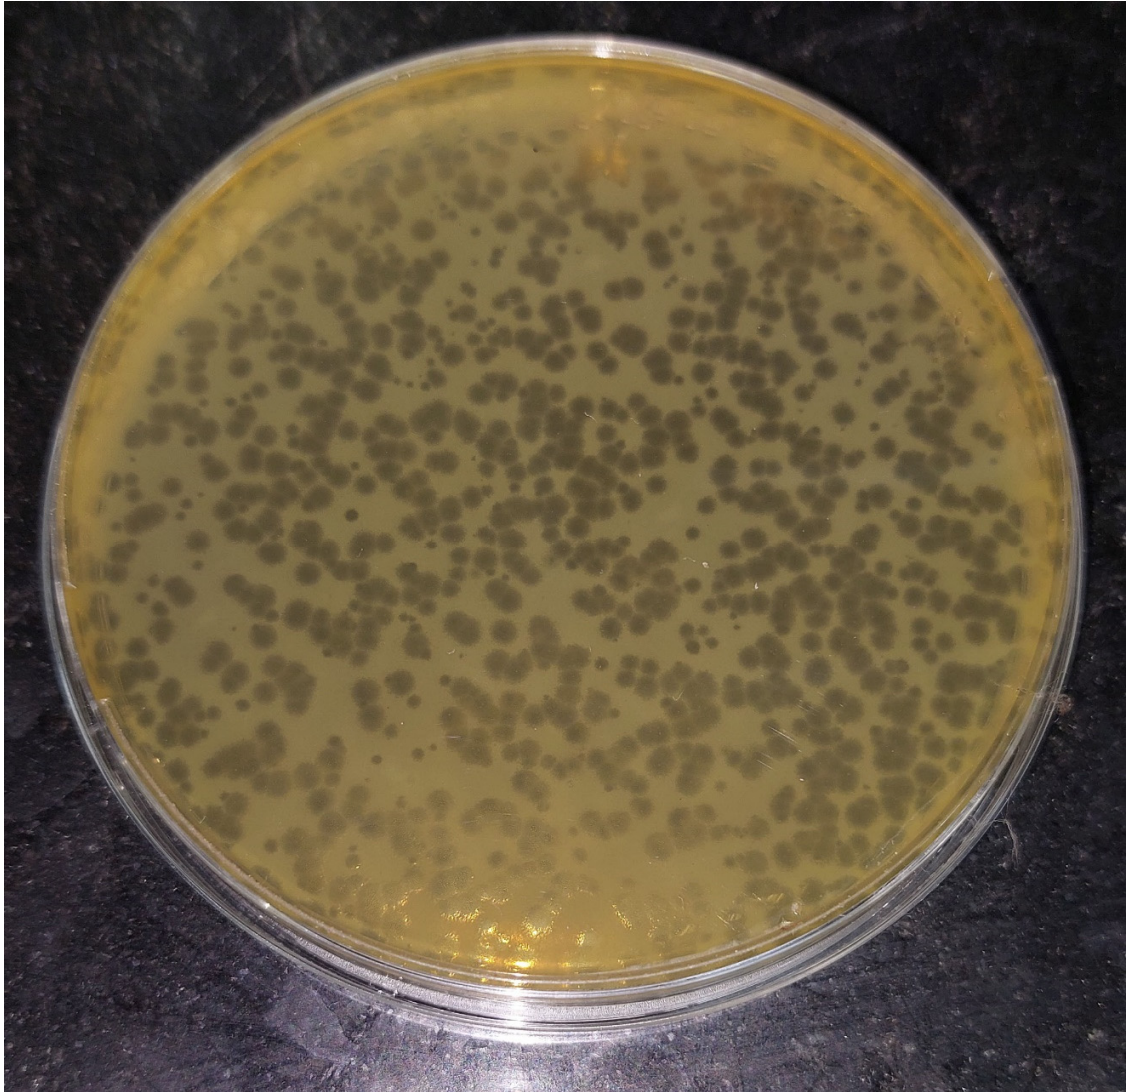

**Figure S2.** Plaque morphology as presented by phages VB\_PAE\_SMP1 and VB\_PAE\_SMP5 . Plaques are clear, regularly circular, small in size (diameter of 2-5 mm) and halos are shown around the plaques.

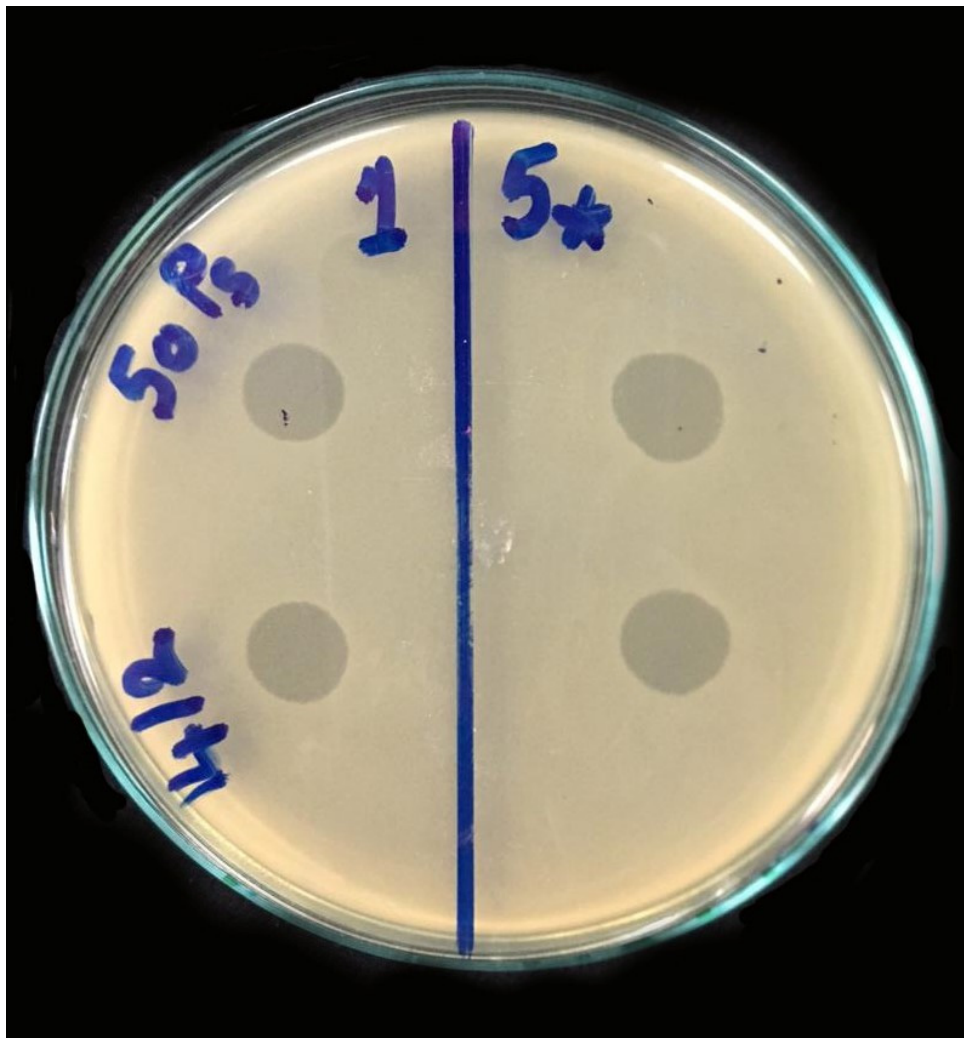

**Figure S3.** Spot test of phages VB\_PAE\_SMP1 and VB\_PAE\_SMP5 against *Pseudomonas aeruginosa* isolate showing clear spots and proving their lytic abilities.

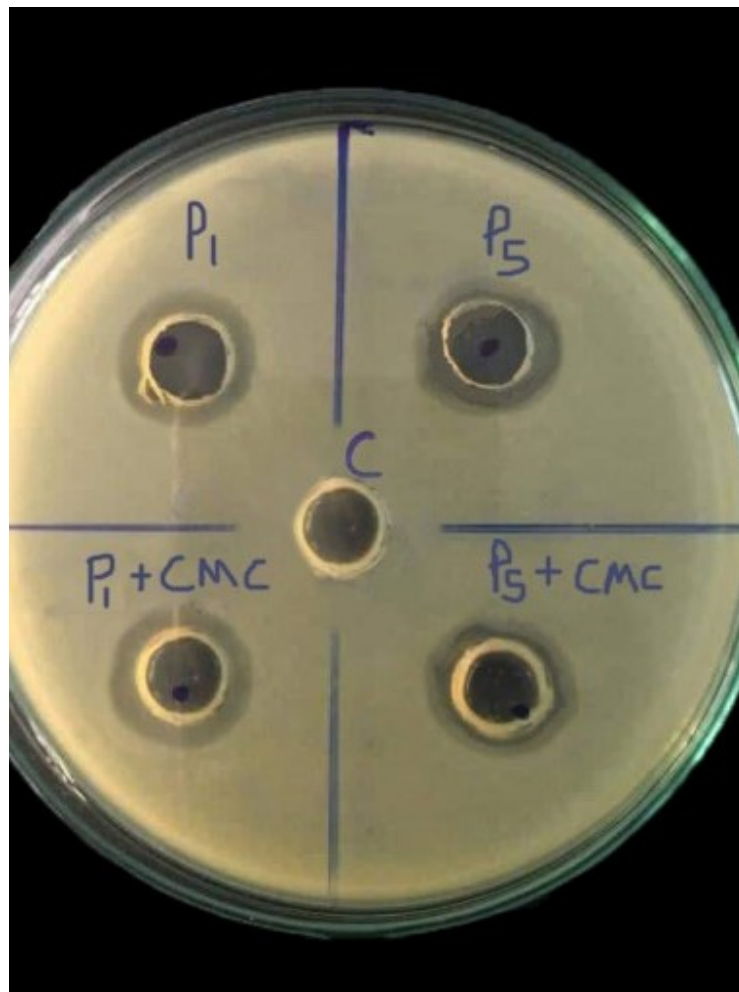

**Figure S4.** In vitro anti-CRPA activity of the tested hydrogels. Phage VB\_PAE\_SMP1 and VB\_PAE\_SMP5 : Positive control. VB\_PAE\_SMP1 +CMC, VB\_PAE\_SMP5 +CMC: Tested hydrogels, C: negative control.

**Table S1.** Genomic analysis (resulted contigs and putative functions of the resulted open reading frames) of the phage vB\_Pae\_SMP5.

| Feature_id            | Location    | Start | Stop  | Strand | Curated function                       | RASTtk annotation                                                                 | BLASTP best hit                                             |
|-----------------------|-------------|-------|-------|--------|----------------------------------------|-----------------------------------------------------------------------------------|-------------------------------------------------------------|
| fig 2731619.91.peg.1  | 48_536      | 48    | 536   | +      | Phage terminase, small subunit         | Phage protein                                                                     | possible small terminase subunit                            |
| fig 2731619.91.peg.2  | 517_2103    | 517   | 2103  | +      | Phage terminase, large subunit         | Phage terminase, large subunit                                                    | terminase-like family protein / large terminase subunit     |
| fig 2731619.91.peg.3  | 2117_3622   | 2117  | 3622  | +      | Phage portal protein                   | Putative structural protein (ACLAME 256)                                          | portal protein                                              |
| fig 2731619.91.peg.4  | 3634_4728   | 3634  | 4728  | +      | Phage minor capsid protein             | Phage minor capsid protein                                                        | F-like head morphogenesis protein                           |
| fig 2731619.91.peg.5  | 4765_5484   | 4765  | 5484  | +      | Phage scaffold protein                 | Phage protein (ACLAME 257)                                                        | scaffold protein                                            |
| fig 2731619.91.peg.6  | 5487_6464   | 5487  | 6464  | +      | Phage major capsid protein             | Phage portal or tail protein (ACLAME 11)                                          | major capsid protein                                        |
| fig 2731619.91.peg.7  | 6534_6938   | 6534  | 6938  | +      | Phage protein                          | Phage protein                                                                     | hypothetical protein ORF011                                 |
| fig 2731619.91.peg.8  | 7004_7375   | 7004  | 7375  | +      | Phage virion structural protein        | Phage protein                                                                     | virion structural protein                                   |
| fig 2731619.91.peg.9  | 7388_7906   | 7388  | 7906  | +      | Phage head-to-tail connector           | Phage protein (ACLAME 313)                                                        | virion protein: head-to-tail connector complex protein      |
| fig 2731619.91.peg.10 | 7910_8290   | 7910  | 8290  | +      | Phage head-tail joining protein        | Phage protein (ACLAME 302)                                                        | Head-tail joining protein                                   |
| fig 2731619.91.peg.11 | 8287_8742   | 8287  | 8742  | +      | Phage minor tail protein               | Peptidoglycan binding protein                                                     | Minor tail protein                                          |
| fig 2731619.91.peg.12 | 8903_10345  | 8903  | 10345 | +      | Phage major tail tube protein          | Phage protein                                                                     | major tail tube protein                                     |
| fig 2731619.91.peg.13 | 10409_10837 | 10409 | 10837 | +      | Phage tail chaperonin                  | Phage protein                                                                     | tail chaperonin                                             |
| fig 2731619.91.peg.14 | 10846_11202 | 10846 | 11202 | +      | Phage tail chaperonin                  | Phage protein                                                                     | tail chaperonin                                             |
| fig 2731619.91.peg.15 | 11171_11605 | 11171 | 11605 | +      | Phage tail completion protein          | Phage protein (ACLAME 188)                                                        | tail completion protein                                     |
| fig 2731619.91.peg.16 | 11611_15225 | 11611 | 15225 | +      | Phage tail tape measure protein        | Phage tail tape measure protein                                                   | tape measure protein                                        |
| fig 2731619.91.peg.17 | 15226_16200 | 15226 | 16200 | +      | Phage structural protein               | Phage protein (ACLAME 678)                                                        | virion protein                                              |
| fig 2731619.91.peg.18 | 16200_17144 | 16200 | 17144 | +      | Phage tail assembly protein            | Phage protein (ACLAME 761)                                                        | virion structural protein / tail assembly protein           |
| fig 2731619.91.peg.19 | 17150_18862 | 17150 | 18862 | +      | Phage tail assembly structural protein | Phage protein (ACLAME 463)                                                        | virion structural protein/ tail assembly structural protein |
| fig 2731619.91.peg.20 | 18862_19686 | 18862 | 19686 | +      | FAD/FMN-containing dehydrogenase       | Gene Transfer Agent (GTA) ORF13 or FAD/ FMN-containing dehydrogenase (ACLAME 176) | FAD/FMN-containing dehydrogenase                            |
| fig 2731619.91.peg.21 | 19690_22131 | 19690 | 22131 | +      | Phage central tail hub protein         | Phage protein (ACLAME 455)                                                        | central tail hub                                            |

|                       |             |       |       |   |                                                       |                                                                    |                                                                    |
|-----------------------|-------------|-------|-------|---|-------------------------------------------------------|--------------------------------------------------------------------|--------------------------------------------------------------------|
| fig 2731619.91.peg.22 | 24183_22132 | 24183 | 22132 | - | DNA polymerase B region                               | DNA polymerase B region                                            | DNA polymerase                                                     |
| fig 2731619.91.peg.23 | 25337_24195 | 25337 | 24195 | - | Phage replicative clamp                               | Phage protein                                                      | replicative clamp                                                  |
| fig 2731619.91.peg.24 | 25548_25321 | 25548 | 25321 | - | Phage protein                                         | Phage protein                                                      | hypothetical protein<br>vB_Pae_PS9N_00041                          |
| fig 2731619.91.peg.25 | 27208_25553 | 27208 | 25553 | - | Phage DNA helicase                                    | Phage DNA helicase (ACLAME 43)                                     | putative helicase/ DEAD box helicase                               |
| fig 2731619.91.peg.26 | 28097_27201 | 28097 | 27201 | - | Phage exonuclease RecB                                | Phage protein                                                      | exonuclease/ RecB exonuclease                                      |
| fig 2731619.91.peg.27 | 28731_28204 | 28731 | 28204 | - | hypothetical protein                                  | hypothetical protein                                               | hypothetical protein TehO_047                                      |
| fig 2731619.91.peg.28 | 29556_28810 | 29556 | 28810 | - | Phage single-stranded DNA-binding protein             | Phage protein (ACLAME 618)                                         | hypothetical protein 40_00002/ single-stranded DNA-binding protein |
| fig 2731619.91.peg.29 | 30331_29615 | 30331 | 29615 | - | Phage recombinase RecA                                | Phage methyl-accepting chemotaxis protein (ACLAME 1366)            | RecA/ AAA domain-containing protein                                |
| fig 2731619.91.peg.30 | 30826_30386 | 30826 | 30386 | - | Phage protein                                         | Phage protein                                                      | hypothetical protein ORF033                                        |
| fig 2731619.91.peg.31 | 31460_30903 | 31460 | 30903 | - | Phage MazG nucleotide pyrophosphatase/toxin-antitoxin | Phage MazG nucleotide pyrophosphatase/toxin-antitoxin (ACLAME 361) | MazG                                                               |
| fig 2731619.91.peg.32 | 31598_31786 | 31598 | 31786 | + | Phage putative transcriptional regulator              | Phage protein                                                      | hypothetical protein ORF035/ transcriptional regulator             |
| fig 2731619.91.peg.33 | 31776_34097 | 31776 | 34097 | + | Phage DNA primase/helicase                            | DNA primase/helicase, phage-associated                             | DNA primase/helicase                                               |
| fig 2731619.91.peg.34 | 34249_34518 | 34249 | 34518 | + | hypothetical protein                                  | hypothetical protein                                               | hypothetical protein KAK25_00045                                   |
| fig 2731619.91.peg.35 | 35042_34614 | 35042 | 34614 | - | hypothetical protein                                  | hypothetical protein                                               | hypothetical protein KAK25_00040                                   |
| fig 2731619.91.peg.36 | 35065_35283 | 35065 | 35283 | + | hypothetical protein                                  | hypothetical protein                                               | hypothetical protein                                               |
| fig 2731619.91.peg.37 | 35280_35537 | 35280 | 35537 | + | hypothetical protein                                  | hypothetical protein                                               | hypothetical protein S3_044                                        |
| fig 2731619.91.peg.38 | 35858_36133 | 35858 | 36133 | + | hypothetical protein                                  | hypothetical protein                                               | hypothetical protein KAK25_00042                                   |
| fig 2731619.91.peg.39 | 36130_36309 | 36130 | 36309 | + | hypothetical protein                                  | hypothetical protein                                               | hypothetical protein KAK25_00044                                   |
| fig 2731619.91.peg.40 | 36612_36833 | 36612 | 36833 | + | hypothetical protein                                  | hypothetical protein                                               | hypothetical protein                                               |
| fig 2731619.91.peg.41 | 36882_37256 | 36882 | 37256 | + | Phage protein                                         | Phage protein                                                      | hypothetical protein vBPaeSC1_02                                   |
| fig 2731619.91.peg.42 | 37317_37538 | 37317 | 37538 | + | Phage RNA polymerase-binding protein                  | hypothetical protein                                               | hypothetical protein KAK25_00047 / RNA polymerase-binding protein  |
| fig 2731619.91.peg.43 | 37535_38071 | 37535 | 38071 | + | Phage endonuclease                                    | Phage protein (ACLAME 766)                                         | endonuclease                                                       |

|                       |             |       |       |   |                                           |                                               |                                                                                                |
|-----------------------|-------------|-------|-------|---|-------------------------------------------|-----------------------------------------------|------------------------------------------------------------------------------------------------|
| fig 2731619.91.peg.44 | 38071_38274 | 38071 | 38274 | + | hypothetical protein                      | hypothetical protein                          | hypothetical protein KAK25_00049                                                               |
| fig 2731619.91.peg.45 | 38271_38450 | 38271 | 38450 | + | hypothetical protein                      | hypothetical protein                          | hypothetical protein                                                                           |
| fig 2731619.91.peg.46 | 38511_38816 | 38511 | 38816 | + | Phage protein                             | Phage protein                                 | hypothetical protein                                                                           |
| fig 2731619.91.peg.47 | 38833_39123 | 38833 | 39123 | + | Phage endolysin                           | Phage endolysin                               | hypothetical protein S4_053                                                                    |
| fig 2731619.91.peg.48 | 39116_39349 | 39116 | 39349 | + | Phage protein                             | Phage protein                                 | hypothetical protein KAK25_00053                                                               |
| fig 2731619.91.peg.49 | 39420_39587 | 39420 | 39587 | + | Phage protein                             | Phage protein                                 | hypothetical protein vBPaeW3_33                                                                |
| fig 2731619.91.peg.50 | 39578_40045 | 39578 | 40045 | + | Putative dCMP deaminase                   | Putative dCMP deaminase<br>(ACLAME 374)       | dCMP deaminase                                                                                 |
| fig 2731619.91.peg.51 | 40051_40434 | 40051 | 40434 | + | Phage protein                             | Phage protein                                 | hypothetical protein ORF050                                                                    |
| fig 2731619.91.peg.52 | 40469_40678 | 40469 | 40678 | + | Phage protein                             | Phage protein                                 | hypothetical protein HL17_gp51                                                                 |
| fig 2731619.91.peg.53 | 40762_41334 | 40762 | 41334 | + | Phage protein                             | Phage protein                                 | hypothetical protein ORF052                                                                    |
| fig 2731619.91.peg.54 | 41483_41737 | 41483 | 41737 | + | Phage protein found in lysis<br>cassettes | Phage protein                                 | hypothetical protein AVU20_gp01/<br>member of phage protein family<br>found in lysis cassettes |
| fig 2731619.91.peg.55 | 41734_42000 | 41734 | 42000 | + | Phage holin                               | Phage protein                                 | holin                                                                                          |
| fig 2731619.91.peg.56 | 41993_42538 | 41993 | 42538 | + | Phage tail fiber-associated<br>endolysin  | Phage tail fiber protein (long tail<br>fiber) | endolysin / TPA: Tail associated<br>lysozyme                                                   |
| fig 2731619.91.peg.57 | 42550_42855 | 42550 | 42855 | + | Phage Rz protein                          | Phage protein                                 | Rz protein                                                                                     |
